# Supplementary material for: Effects of Dezocine on the Reduction of Emergence Delirium after Laparoscopic Surgery: A Retrospective Propensity Score-Matched Cohort Study
Source: MDPI journal article supplement (doi:10.3390/jpm13040590), 2023-03-28
Supplement: s1 [file s1]

**Table S1.** RR of the Primary Outcome in the Propensity Score-Matched Cohort.

|                           | <b>Absolute Risk Difference, % (95% CI)</b> | <b>RR (95% CI)</b>  |
|---------------------------|---------------------------------------------|---------------------|
| <b>Emergency delirium</b> |                                             |                     |
| Dezocine group            | -6.1 (-12 to -0.2)                          | 0.63 (0.18 to 0.74) |
| Non-dezocine group        | [Reference]                                 | [Reference]         |
